# Supplementary material for: Modelling Circulating Tumour Cells for Personalised Survival Prediction in Metastatic Breast Cancer
Source: PubMed Central journal article supplement (PMC4433130; doi:10.1371/journal.pcbi.1004199), 2015-05-15
Supplement: pcbi.1004199.s005.pdf [file pcbi.1004199.s005.pdf]

---

# Modelling circulating tumour cells for personalised survival prediction in metastatic breast cancer

Gianluca Ascolani<sup>1,✉</sup>, Annalisa Occhipinti<sup>1,✉\*</sup>, Pietro Liò<sup>1,✉</sup>

1 University of Cambridge, Computer Laboratory, Cambridge, UK

✉These authors contributed equally to this work. \* ao356@cl.cam.ac.uk

S1 Table. List of datasets

| Accession Number | Reference              | p-values     |                       |              |
|------------------|------------------------|--------------|-----------------------|--------------|
|                  |                        | CD47         | EPCAM                 | CD44         |
| GSE29044         | Colak et al. [69]      | $4.39^{-02}$ | $1.17^{-03}$          | $6.70^{-02}$ |
| GSE15852         | Pau et al. [70]        | $1.05^{-01}$ | $4.88 \cdot 10^{-17}$ | $4.49^{-02}$ |
| GSE55070         | Drews et al. [71]      | $1.18^{-01}$ | N/A                   | N/A          |
| GSE46563         | Jonsdottir et al. [72] | 0.11326064   | 0.41234569            | 0.00432464   |
| GSE54465         | Limame et al. [73]     | $1.01^{-02}$ | $5.66^{-01}$          | 1.1390259    |
| GSE46141         | Kimbung et al. [74]    | 0.489669     | 0.125039              | 0.89891      |
| GSE48371         | Pagliuca et al. [75]   | 0.1558076    | 0.323313              | 0.0980182    |

Details of the datasets analysed to estimate the p-value of overexpression of CD47, CD44 and EPCAM in ductal carcinoma in situ (DCIS) and invasive ductal carcinoma (IDC) versus control under different experimental conditions.
